# Supplementary material for: Fe3O4@SiO2@CS.HCl.VO3 as A Novel Recyclable Heterogeneous Catalyst with Core-Shell Structure for Oxidation of Sulfides
Source: Research Square preprint supplement (doi:10.21203/rs.3.rs-3797719/v1), 2023-12-29
Supplement: Supplementary file 1 [file a90d12aafa0c1c831dc6c602.docx]

| Entry | Sulfoxide | Time (h) | Yield (%) | Mp [Ref] (°C) |
| --- | --- | --- | --- | --- |
| 1 |  | 1.5 | 93 | 29-30 35 |
| 2 |  | 1 | 95 | 69-71 35 |
| 3 |  | 1 | 98 | 121-123 35 |
| 4 |  | 1.5 | 95 | 122-124 52 |
| 5 |  | 2 | 94 | 141-143 53 |
| 6 |  | 2 | 94 | 137 35 |
| 7 |  | 1.5 | 92 | 131-133 53 |
| 8 |  | 2 | 92 | 162-164 35 |
| 9 |  | 2.5 | 94 | 171-173 35 |
| 10 |  | 2.5 | 92 | 110-112 35 |
| 11 |  | 2 | 94 | 150-152 35 |
| 12 |  | 1.5 | 95 | 29-30 52 |
| a Reaction conditions: sulfide (1 mmol), H2O2 (0.4 mL), Catalyst (0.05 g), EtOH, 25 °C | | | | |

**Table 2.** Oxidation of sulfides into sulfoxides catalyzed by Fe3O4@SiO2@CS.HCl.VO3a
